# Supplementary material for: Associations between lung function and future cardiovascular morbidity and overall mortality in a predominantly First Nations population: a cohort study
Source: PubMed Central journal article supplement — Lancet Reg Health West Pac. 2021 Jul 5;13:100188. doi: 10.1016/j.lanwpc.2021.100188 (PMC8403916; doi:10.1016/j.lanwpc.2021.100188), 2021-07-05
Supplement: mmc2.pdf [file mmc2.pdf]

## Supplement

Supplement Figure S1. Percentages of patients within each FVC Z-scores (zFVC) category assigned to each outcome.

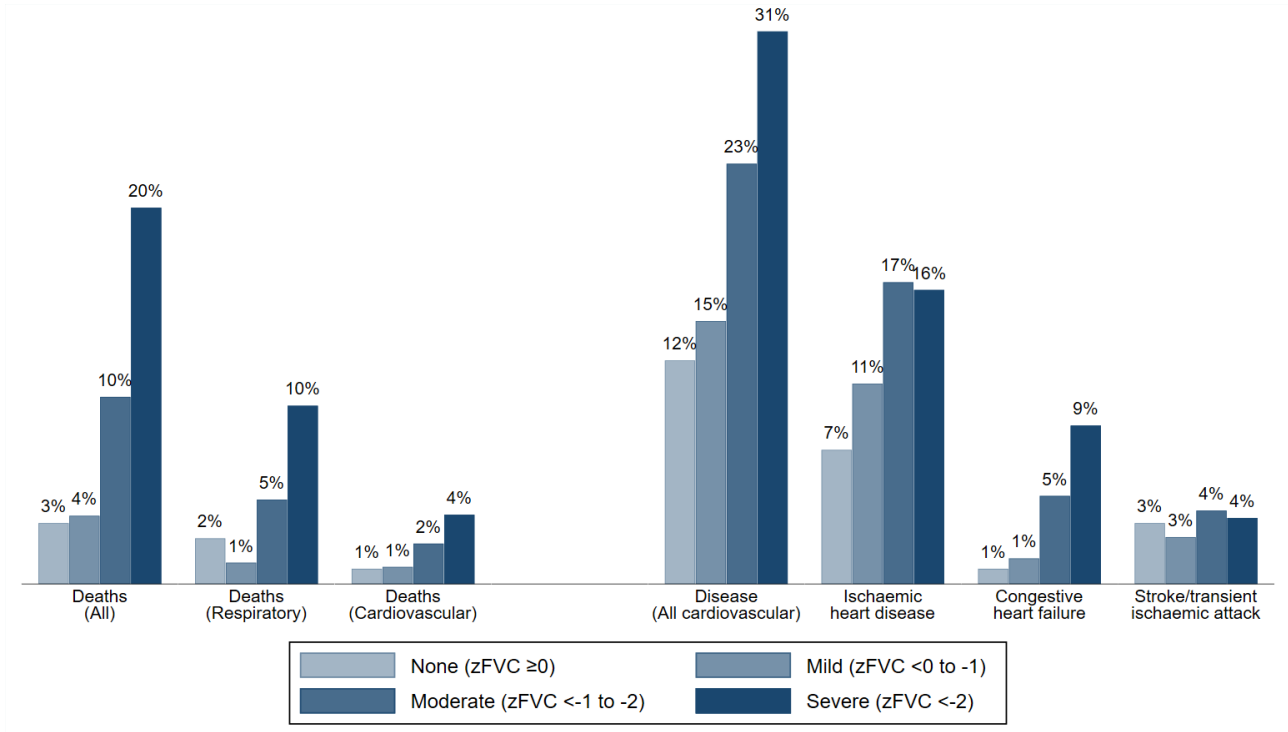

**Supplement Table S1. Adjusted odds ratios (ORs) for respiratory and cardiovascular disease in two multivariable models, with FEV<sub>1</sub>/FVC% as the focus.**

|                            |             | Respiratory disease |       | Cardiovascular disease |       |
|----------------------------|-------------|---------------------|-------|------------------------|-------|
|                            |             | OR (95%CI)          | p     | OR (95%CI)             | p     |
| Age (per 10-year increase) |             | 1.22 (1.11, 1.33)   | <0.01 | 1.61 (1.44, 1.80)      | <0.01 |
| Sex                        | Female      | 1.02 (0.79, 1.32)   | 0.81  | 0.70 (0.54, 0.91)      | <0.01 |
| First Nations status       |             | 0.97 (0.62, 1.49)   | 0.87  | 1.10 (0.65, 1.84)      | 0.73  |
| BMI                        | Underweight | 1.08 (0.58, 1.99)   | 0.09  | 1.07 (0.56, 2.04)      | 0.20  |
|                            | Normal      | Reference           |       | Reference              |       |
|                            | Overweight  | 1.18 (0.81, 1.72)   |       | 1.36 (0.92, 2.01)      |       |
|                            | Obese       | 1.51 (1.07, 2.13)   |       | 1.01 (0.70, 1.46)      |       |
| Smoking*<br>(n=1571)       | Current     | 1.06 (0.75, 1.48)   | 0.33  | 2.02 (1.37, 2.96)      | 0.01  |
|                            | Former      | 1.29 (0.91, 1.82)   |       | 1.68 (1.17, 2.42)      |       |
|                            | Never       | Reference           |       | Reference              |       |
| FEV <sub>1</sub> /FVC%     |             | Z-score             |       |                        |       |
| Clinically normal          | ≥0          | Reference           | <0.01 | Reference              | 0.91  |
|                            | <0 to -1    | 1.38 (0.82, 2.34)   |       | 0.69 (0.38, 1.27)      |       |
|                            | <-1 to -2   | 2.43 (1.35, 4.39)   |       | 1.08 (0.59, 1.98)      |       |
| Clinically abnormal        | <-2         | 5.78 (3.01, 11.1)   |       | 1.04 (0.60, 1.83)      |       |
|                            |             | 1.26 (0.93, 1.72)   | 0.13  | 2.22 (1.69, 2.92)      | <0.01 |
| Hypertension               |             | 1.26 (0.93, 1.72)   | 0.13  | 2.22 (1.69, 2.92)      | <0.01 |
| Type 2 diabetes            |             | 1.16 (0.83, 1.61)   | 0.38  | 2.45 (1.83, 3.29)      | <0.01 |

Two multivariable logistic regression models, fit for age, sex, First Nations status, body mass index (BMI), smoking status, hypertension,

type 2 diabetes, and FEV<sub>1</sub>/FVC%. \*Patients with missing smoking data (n=163) included in modelling but excluded from global Wald test.
